# Supplementary material for: Assessment of Circulating Nucleic Acids in Cancer: From Current Status to Future Perspectives and Potential Clinical Applications
Source: MDPI journal article supplement (doi:10.3390/cancers13143460), 2021-07-10
Supplement: s1 [file s1]

Supplementary Material

# Assessment of Circulating Nucleic Acids in Cancer: From Current Status to Future Perspectives and Potential Clinical Applications

Gabriella Cirmena, Martina Dameri, Francesco Ravera, Piero Fregatti, Alberto Ballestrero and Gabriele Zoppoli

Table S1. A list of the most common extraction kits for cf/ctDNA and cfrRNA with their processing features. For sample types P = plasma, S = serum, U = urine, O = other body fluids.

| Extraction Kit Name                                   | Company             | Sample Type | Method                                 | Execution                   | Input vol. (mL) | Elution Vol. (μL) | Extracted Specimen |
|-------------------------------------------------------|---------------------|-------------|----------------------------------------|-----------------------------|-----------------|-------------------|--------------------|
| ctDNA Purification Kit                                | Abnova              | P, S, U, O  | Magnetic beads                         | Manual/automated protocols  | 2–6             | 50                | cfDNA              |
| Cell-Free DNA Purification Kit                        | Active Motif        | P, S        | Magnetic beads                         | Manual/automatable          | 0.1–10          | 6.25–50           | cfDNA              |
| Hipro Circulating Cell-Free DNA (cfDNA) Isolation Kit | Ambio               | P, S, U, O  | Spin columns                           | Manual                      | 0.1–1           | 20–100            | cfDNA              |
| PME free-circulating DNA Extraction Kit               | AnalitikJena        | P, S, U     | Polymer mediated enrichment technology | Manual                      | 1–10            | 50                | cfDNA              |
| MagMAX Cell-Free DNA Isolation Kit                    | Applied Biosystems  | P, S, U     | Magnetic beads                         | Manual/automated protocols  | 0.1–10          | 15–150            | cfDNA              |
| MagMAX Cell-Free Total Nucleic Acid Isolation Kit     | Applied Biosystems  | P           | Magnetic beads                         | Manual/automated protocols  | 1–6             | 15–60             | cfDNA/RNA          |
| Apostle MiniMax High Efficiency Isolation Kit         | Beckman Coulter     | P, S, U     | Magnetic beads                         | Manual/automatable          | 1–5             | 2–100             | cfDNA              |
| cfPure Cell Free DNA Extraction Kit                   | BioChain            | P, S, U     | Silica-coated paramagnetic particles   | Manual/automated protocols  | <1–10           | 15–50             | cfDNA              |
| MagListo cfDNA Extraction Kit                         | Bioneer             | P, S, U, O  | Magnetic nanobeads                     | Manual/automated protocols  | 1–5             | 30–70             | cfDNA              |
| NextPrep-Mag cfDNA Isolation Kit                      | Bio Scientific      | P           | Magnetic beads                         | Manual or automated version | 1–5             | 12–60             | cfDNA              |
| NextPrep-Mag Urine cfDNA Isolation Kit                | Bio Scientific      | U           | Magnetic beads                         | Manual, automation-friendly | 1–20            | 3–60              | cfDNA              |
| The NextPrep Magnazol cfrRNA Isolation Kit            | Bio Scientific      | P, S        | Magnetic beads                         | Manual                      | 0.2–1.2         | <18               | cfrRNA             |
| SubXTM cfDNA Isolation kit                            | Capital Biosciences | P, S, U     | SubX substance and solid phase matrix  | Manual                      | 2–50            | 20–50             | cfDNA              |
| truXTRAC cfDNA Kit                                    | Covaris             | P           | Magnetic beads                         | Manual/automated protocols  | 1               | 35–50             | cfDNA              |
| Sera-Xtracta Cell-Free DNA Kit                        | Cytiva              | P, S, U     | Magnetic beads                         | Manual/automated protocols  | 0.5–4           | 15–60             | cfDNA              |

|                                                               |                          |            |                            |                                      |          |         |                                           |
|---------------------------------------------------------------|--------------------------|------------|----------------------------|--------------------------------------|----------|---------|-------------------------------------------|
| Helix Circulating Nucleic Acids Kit                           | Diatech pharmacogenetics | P          | Silica membrane system     | Manual                               | 1–5      | ND      | cfDNA                                     |
| EpiQuik Circulating Cell-Free DNA (ccfDNA) Isolation Easy Kit | Epigentek                | P, S, U, O | Magnetic beads             | Manual                               | 0.1–1    | 20      | cfDNA                                     |
| Presto cfDNA/cfRNA Extraction Kit                             | Geneaid                  | P, S       | Spin columns               | Manual                               | 1–5      | 30–50   | cfDNA/RNA                                 |
| cfDNA/RNA Extraction Kit                                      | Ibi Scientific           | P, S       | Spin columns               | Manual                               | 1–5      | 30–50   | cfDNA/RNA                                 |
| NucleoSpin cfDNA Kits                                         | Macherey–Nagel           | P, S       | Silica membrane columns    | Manual (vacuum)                      | 0.2–5    | 100/200 | cfDNA                                     |
| NucleoSnap cfDNA Kit                                          | Macherey–Nagel           | P, S, U    | Silica membrane columns    | Manual (vacuum)                      | 1–10     | 20–100  | cfDNA                                     |
| NucleoSpin cfDNA XS                                           | Macherey–Nagel           | P          | Silica membrane columns    | Manual (centrifugation)              | <0.240   | 5–30    | cfDNA                                     |
| cfKapture Kit                                                 | Magbio                   | P, S       | Magnetic beads             | Manual                               | 0.2–5    | 30–100  | cfDNA                                     |
| GenElute UltraMag Cell-Free DNA Kit                           | Merck                    | P          | Magnetic beads             | Manual                               | 0.5–10   | 6–125   | cfDNA                                     |
| GenElute Urine Cell-Free DNA Purification Kit                 | Merck                    | U          | Spin column chromatography | Manual                               | 0.250–2  | 25–100  | cfDNA, viral DNA                          |
| Plasma/Serum Cell-Free Circulating DNA Purification Kits      | Norgen Biotek Corp       | P, S       | Spin column chromatography | Manual                               | 0.01–10  | 25–50   | cfDNA, bacterial or viral DNA             |
| Plasma/Serum cfc-DNA Advanced Purification Kit                | Norgen Biotek Corp       | P, S       | Spin column chromatography | Automated (Hamilton MicroLab Nimbus) | 0.5–6    | 25–50   | cfDNA                                     |
| Urine Cell-Free Circulating DNA Purification Kits             | Norgen Biotek Corp       | U          | Spin column chromatography | Manual                               | 0.250–30 | 50–100  | cfDNA, viral DNA                          |
| Mag-Bind cfDNA Kit                                            | Omega Biotek             | P, S       | Magnetic beads             | Manual/automated protocols           | 0.5–10   | 50      | cfDNA                                     |
| Phasify MAX cfDNA Extraction Kit                              | Phasify                  | P          | Liquid phase mechanism     | Manual                               | 0.1–feb  | 5–150   | cfDNA                                     |
| Maxwell RSC ccfDNA Plasma Kit                                 | Promega                  | P          | Magnetic beads             | Automated                            | 0.2–1    | <60     | cfDNA                                     |
| QIAamp Circulating Nucleic Acid                               | Qiagen                   | P, S, U, O | Silica membrane columns    | Manual (vacuum)                      | 1–5      | 20–150  | cfDNA/RNA, miRNA, viral DNA/RNA           |
| QIAasymphony DSP Circulating DNA Kit                          | Qiagen                   | P, U       | Magnetic beads             | Automated (QIAasymphony SP)          | 2/4      | 60      | cfDNA                                     |
| QIAamp DSP Circulating NA Kit                                 | Qiagen                   | P, S, U    | Silica membrane columns    | Manual (vacuum)                      | 1–5      | 20–150  | cfDNA/RNA/miRNA                           |
| QIAamp MinElute ccfDNA Kit                                    | Qiagen                   | P, S       | Magnetic beads             | Partially automated                  | 1–10     | 20–80   | cfDNA                                     |
| QIAamp ccfDNA/RNA Kit                                         | Qiagen                   | P, S       | Silica membrane columns    | Partially automated                  | 1–4      | 14–20   | cfDNA/RNA, miRNA, vesicular nucleic acids |
| EZ1 ccfDNA Kit                                                | Qiagen                   | P, S       | Magnetic beads             | Semi-automated                       | 1–10     | 55–65   | cfDNA                                     |
| miRNeasy Serum/Plasma Kit                                     | Qiagen                   | P, S, O    | Spin columns               | Manual/automatable                   | <0.2     | 14      | cfRNA, miRNA                              |

|                                         |                  |            |                             |                                        |       |             |                                    |
|-----------------------------------------|------------------|------------|-----------------------------|----------------------------------------|-------|-------------|------------------------------------|
| MagNA Pure 24 Total<br>NA Isolation Kit | Roche            | P          | Magnetic glass<br>particles | Automated<br>(MagNA Pure 24<br>System) | 2/4   | 100/150/200 | Single or double<br>stranded cfDNA |
| Sentosa SX Cell-free<br>DNA Kit         | Vela Diagnostics | P          | Magnetic beads              | Automated                              | >4    | ND          | cfDNA                              |
| IDXtract-MAG                            | Xid Solutions    | P          | Magnetic beads              | Automated                              | 1–8   | ND          | cfDNA                              |
| Quick-cfDNA/cfRNA<br>Serum & Plasma Kit | Zymo Research    | P, S, U, O | Zymo-Spin IC<br>Columns     | Manual                                 | 0.2–3 | 6–15        | cfDNA/RNA                          |
